# Supplementary material for: Nickel(II) complexes with dithiadiiminoamine and dithiabis(thiosemicarbazone) ligands †
Source: Royal Society of Chemistry journal article supplement (doi:10.1039/a906294g), 2000-01-01
Supplement: a906294g.doc [file a906294g.doc]

**Supplementary materials (4 pages)**

Dalton 9/06294G

**Nickel(II) complexes with dithiadiiminoamine and**

**dithiabis(thiosemicarbazone) ligands.**

Vitaly V. Pavlishchuk, Sergey V. Kolotilov, Anthony W. Addison, Raymond

J. Butcher and Ekkehard Sinn

Table S1 (1 page), Table S2 (3 pages).

**Table. S1: Selected infrared absorptions.**

___________________________________________________________________

Compound Vibration Frequency / cm-1

___________________________________________________________________

**1** Ni(Dtdida)(ClO4)2**.**0.5 H2O (N-H) + (O-H) 3339 (s); 3287 (s);

3257 (s); 3130 (m)

(N-H) 1583 (m)

(C=N) 1674 (s)

DtdtzH2 (C=S) 840 (m)

amide III band + (C-N) + 1280 (sh); 1260 (s);

+ (C=S) 1235 (s)

(C=N) 1587

amide II band+(C-N) 1493 (s); 1360 (m)

(NH2) + (NH) 3360 (s); 3290 (w); 3220 (s); 3133 (s)

**2** Ni(DtdtzH2)(ClO4)2 (C=S) 765 (m)

amide III band + (C-N) + 1223 (w) a

+ (C=S)

(C=N) 1556 (s)

amide II band + (C-N) 1383 (m); 1310 (w)

(NH2) + (NH) 3455 (m); 3296 (s); 3190

**3** Ni(Dtdtz) (C=S) 740 (m)

amide III band + (C-N) + 1210 (m); 1160(s)

+ (C=S)

(C=N) 1470 (s)

amide II band+(C-N) 1360 (w); 1345 (w);

1320 (s)

(NH2) + (NH) 3430 (s); 3350 (w); 3285 (s); 3170(s)

4 Ni(Dtidak)(ClO4)2**.**0.5 CH3CN (C=N) 1680 (sh.); 1695 (N-H) 1595;

(NH2) + (NH) 3350; 3295

____________________________________________________________

a Other bands with < 1200 cm-1 are obscured by an intense ClO4– vibration with

its maximum at 1077 cm-1.

**Table S2: Selected Redox Potentials for Ni3+/2+ Couplesa**

___________________________________________________________________________

Complex Donor Coordn. Core Solvent E, mV, Ref.

set No. charge *vs*. SCEa

___________________________________________________________________________

Ni(bipy)32+ N6 6 +2 CH3CN +1625 48

Ni(phen)32+ N6 6 +2 CH3CN +1641 48

Ni([18]N6)2+ N6 4 +2 CH3CN +410 49

Ni([9]N3)22+ N6 6 +2 CH3CN +160 49

Ni([11]N3)22+ N6 6 +2 CH3CN +470 49

Ni([10]N3)22+ N6 6 +2 CH3CN +260 49

Ni(bc-SN4)(OH2)2+ SN4O 6 +2 CH3CN +395 50

Ni(Dtdida)2+ S2N4 6 +2 CH3CN +1160 b

Ni(dadtdo)3+ S2N4 6 +3 H2O +330 51

Ni(dadtpo)3+ S2N4 6 +3 H2O +370 51

Ni(emi)– S2N4 5,6? -1 DMF –420 52

Ni(ema)– S2N4 5,6? -1 DMF –340 52

Ni(phma)– S2N4 5,6? -1 DMF –240 52

Ni(Dtdidak)2+ S2N3O 6 +2 CH3CN +1059 b

Ni(pdtc)2- S4N2 6 –2 DMF –85 53

Ni(Dtdtz)2+ S4N2 6 +2 CH3CN +1235 b

Ni(Dtdtz) S4N2 6 0 DMF +236 b

Ni([10] S2N)22+ S4N2 6 +2 CH3CN +480 54

Ni([9] S2N)22+ S4N2 6 +2 CH3CN +460 55

Ni([10]S3)22+ S6 6 +2 CH3CN +520 56

Ni([9] S3)22+ S6 6 +2 CH3CN +590 57

Ni([15]N5)2+ N5 6 +2 CH3CN +1035 58

Ni([16]N5)2+ N5 6 +2 CH3CN +1070 59

Ni([17]N5)2+ N5 6 +2 CH3CN +1115 59

Ni([12]N4)2+ N4 4 +2 CH3CN +1380 59

Ni([14]N4)2+ N4 4 +2 CH3CN +1000 59

Ni([14]N4)2+ N4 4 +2 CH3CN +1013 47

Ni(Me2[14])N42+ N4 4 +2 CH3CN +1023 47

Ni(Me4[14])N42+ N4 4 +2 CH3CN +1053 47

Ni(iso-[14]N4)2+ N4 4 +2 CH3CN +1136 42

Ni([15]N4)2+ N4 4 +2 CH3CN +1310 42

Ni([16]N4)2+ N4 4 +2 CH3CN +1410 42

Ni(bme-daco-C3H6)2+ N2S2 4 +2 CH3CN +167 46

Ni(bme*-daco-C3H6)2+ N2S2 4 +2 CH3CN +174 46

Ni(bme-daco-C2H4)2+ N2S2 4 +2 CH3CN +130 46

Ni(bme*-daco-C2H4)2+ N2S2 4 +2 CH3CN +153 46

Ni(bme-daco-xylyl)2+ N2S2 4 +2 CH3CN +242 46

Ni(bme*-daco-xylyl)2+ N2S2 4 +2 CH3CN +272 46

Ni(nbdt)2– S4 4 -1 DMF -760 59

Ni(bdt)2– S4 4 -1 DMF -750 60

Ni(qdt)2– S4 4 -1 DMF –120 61

Ni(qdtH2)23+ S4 4 -1 DMF –120 61

____________________________________________________________________________

a: The data reported *vs* various different reference electrodes electrode were converted *vs*.SCE as described in [13].

b: This work.

[9]N3 = 1,4,7-triazacyclononane;

[9]SN2 =1,4-diaza-7-thiacyclononane;

[9]S2N = 1-aza-5,8-dithiacyclodecane;

[9]S3 = 1,4,7-trithiacyclononane;

[10]SN2 = 1-thia-4,8-diazacyclodecane;

[10]S2N = 1-aza-4,7-dithiacyclononane

[10]S3 = 1,4,7-triazacyclodecane;

[11]S3 = 1,4,7-triazacyclododecane;

[12]N4 = 1,4,7,10-tetraazacyclododecane;

[14]N4 = 1,4,8,11-tetraazacyclotetradecane;

Me2[14]N4 = 2,3-dimethyl-1,4,8,11-tetraazacyclotetradecane;

Me4[14]N4 = 1,4,8,11-tetramethyl-1,4,8,11-tetraazacyclotetradecane;

iso-[14]N4 = 1,4,8,12-tetraazacyclotetradecane;

[15]N4 = 1,4,8,12-tetraazacyclopentadecane;

[16]N4 = 1,5,9,13-tetraazacyclohexadecane;

[15]N5 = 1,4,7,10,13-pentaazacyclopentadecane;

[16]N5 = 1,4,7,10,13-pentaazacyclohexadecane;

[17]N5 = 1,4,7,11,14-pentaazacycloheptane;

bc-SN4= bc-[19] ane SN4 = 15-thia-1,5,8,12-tetraazabicyclo[10.5.2]nonadecane.

[18]N6 = 1,4,7,10,13,16-hexaazacyclooctadecane;

[18]S4N2 = 1,10-diaza-4,7,13,16-tetrathiacyclooctadecane;

bbmtpH2 = 1,3-bis[[2-(1-methyl-7-oxotriazen-3-yl)phenyl]thio]propane;

bdtH2 = butane-2,3-dithiol;

bhpte = 1,2-bis([*o*-{(4-hydroxy-5-methylphenyl)azo}phenyl]thio)ethane;

bipy = 2,2'-bipyridine;

emaH4 = *N,N*'-ethylenebis[2-(acetylthio)acetamide)];

embH4 = *N,N*'-bis(*o*-mercaptobenzoyl)ethylenediamide);

emiH4 = *N,N*'-ethylenebis[2-(acetylthio)*iso*butyramide);

dadtdo = 3,14-dimethyl-4,13-diaza-7,10-dithiahexadeca-3,13-diene-2,15-dione dioxime;

dadtpo = 3,15-dimethyl-4,14-diaza-7,11-dithiaheptadeca-3,14-diene-2,16-dione dioxime;

nbdtH2 =norbornane-2,3-*exo-cis*-dithiol;

pdtcH2 = pyridine-2,6-bis(thiocarboxylic acid);

phmaH4 = *N,N*'-phenylenebis[2-(acetylthio)acetamide)];

qdtH2 = quinoxaline-2,3-dithiol.
